# Supplementary material
Source: PubMed Central journal article supplement (PMC7415598)
Supplement: NIHMS1599109-supplement-6.pdf [file NIHMS1599109-supplement-6.pdf]

# Supplemental Figures

## Membrane properties

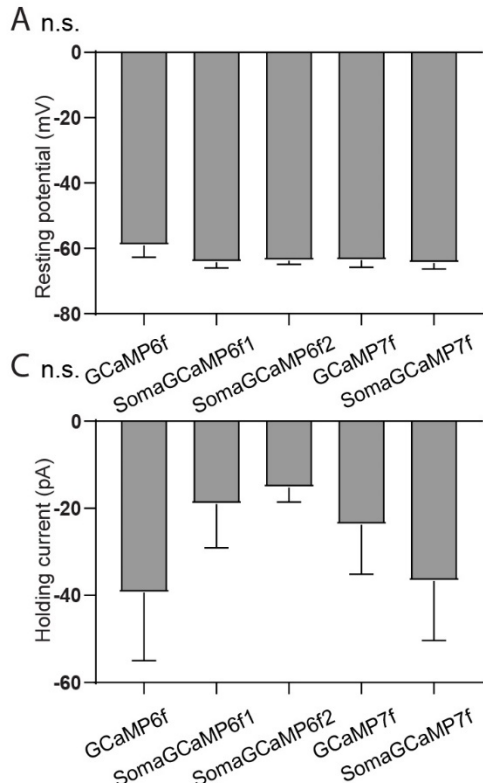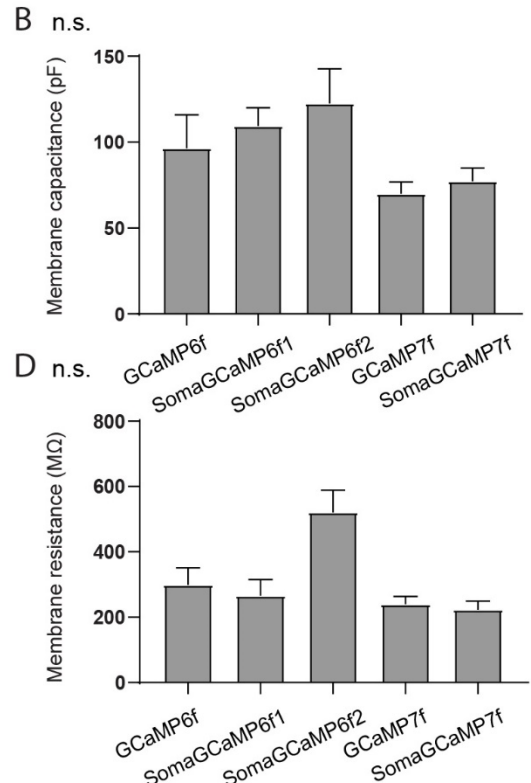

## Action potential properties

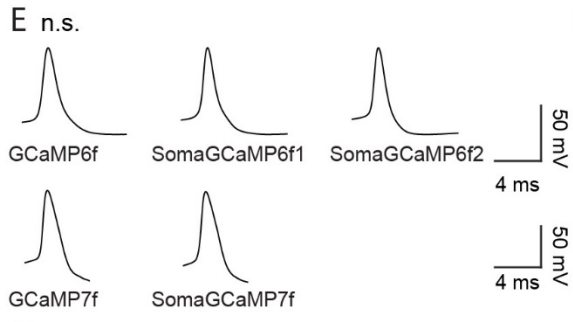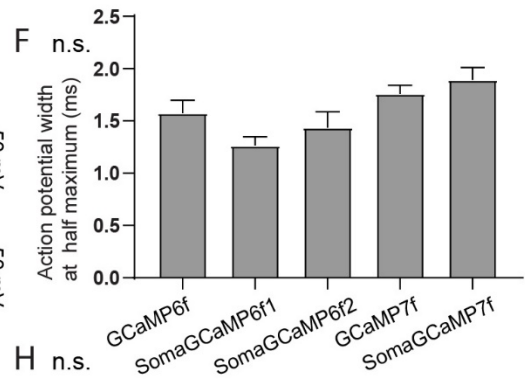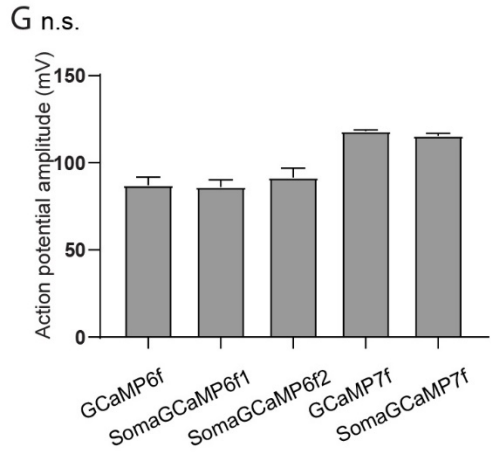

**Figure S1. Membrane and action potential properties of neurons expressing somatic vs. untargeted forms of GCaMP6f and GCaMP7f; related to Figure 3.** Cultured hippocampal neurons expressing GCaMP6f, SomaGCaMP6f1, SomaGCaMP6f2, GCaMP7f and SomaGCaMP7f were patched and membrane properties recorded. **(A-D)** Passive membrane properties. **(A)** Resting potential (n = 6 cells from 2 cultures for GCaMP6f; n = 7 cells from 2 cultures for SomaGCaMP6f1; n = 6 cells from 2 cultures for SomaGCaMP6f2; n = 10 cells from 2 cultures for GCaMP7f; n = 12 cells from 2 cultures for SomaGCaMP7f). Plotted is mean plus or minus standard error throughout the figure. Throughout this figure: n.s., not significant; between GCaMP6f, SomaGCaMP6f, and SomaGCaMP6f2, Kruskal-Wallis analysis of variance followed by post-hoc test via Steel's test with GCaMP6f as control group; n.s., not significant; between GCaMP7f and SomaGCaMP7f, Wilcoxon rank sum test. See **Supplemental Table 5** for full statistics for **Figure S1**. **(B)** Membrane capacitance (n = 5 cells from 2 cultures for GCaMP6f; n = 6 cells from 2 cultures for SomaGCaMP6f1; n = 6 cells from 2 cultures for SomaGCaMP6f2; n = 10 cells from 2 cultures for GCaMP7f; n = 12 cells from 2 cultures for SomaGCaMP7f). **(C)** Holding current while held at -65 mV (n = 5 cells from 2 cultures for GCaMP6f; n = 6 cells from 2 cultures for SomaGCaMP6f1; n = 6 cells from 2 cultures for SomaGCaMP6f2; n = 10 cells from 2 cultures for GCaMP7f; n = 12 cells from 2 cultures for SomaGCaMP7f). **(D)** Membrane resistance (n = 5 cells from 2 cultures for GCaMP6f; n = 6 cells from 2 cultures for SomaGCaMP6f1; n = 6 cells from 2 cultures for SomaGCaMP6f2; n = 10 cells from 2 cultures for GCaMP7f; n = 12 cells from 2 cultures for SomaGCaMP7f). **(E-H)** Action potential properties. **(E)** Averaged action potential waveforms (n = 12 cells from 2 cultures for GCaMP6f; n = 12 cells from 2 cultures for SomaGCaMP6f1; n = 12 cells from 2 cultures for SomaGCaMP6f2; n = 7 cells from 2 cultures for GCaMP7f; n = 7 cells from 2 cultures for SomaGCaMP7f). **(F)** Action potential width (n = 12 cells from 2 cultures for GCaMP6f; n = 12 cells from 2 cultures for SomaGCaMP6f1; n = 12 cells from 2 cultures for SomaGCaMP6f2; n = 7 cells from 2 cultures for GCaMP7f; n = 7 cells from 2 cultures for SomaGCaMP7f). **(G)** Action potential amplitude (n = 12 cells from 2 cultures for GCaMP6f; n = 12 cells from 2 cultures for SomaGCaMP6f1; n = 12 cells from 2 cultures for SomaGCaMP6f2; n = 7 cells from 2 cultures for GCaMP7f; n = 7 cells from 2 cultures for SomaGCaMP7f). **(H)** Action potential threshold (n = 12 cells from 2 cultures for GCaMP6f; n = 12 cells from 2 cultures for SomaGCaMP6f1; n = 12 cells from 2 cultures for SomaGCaMP6f2; n = 7 cells from 2 cultures for GCaMP7f; n = 7 cells from 2 cultures for SomaGCaMP7f).

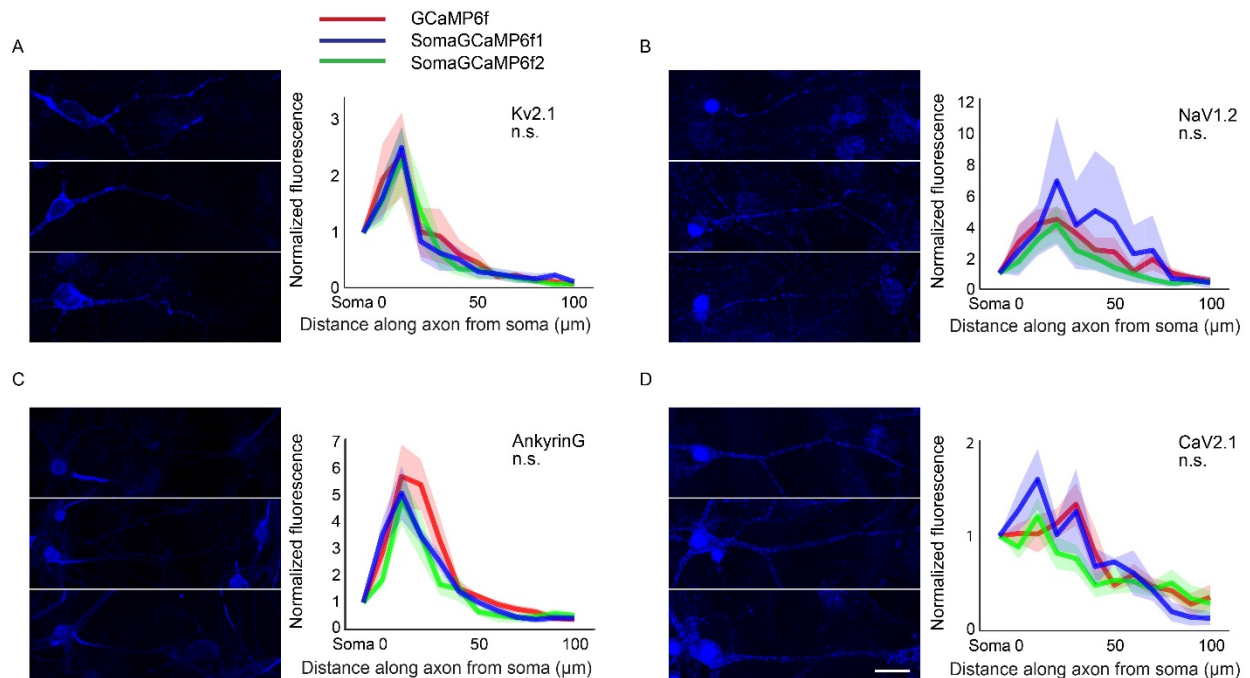

**Figure S2. Distribution of ion channels and Ankyrin<sub>G</sub> in neurons expressing GCaMP6f, SomaGCaMP6f1 or SomaGCaMP6f2; related to Figure 3.** Cultured hippocampal neurons expressing GCaMP6f, SomaGCaMP6f1 and SomaGCaMP6f2 were immunostained using antibodies against ion channels or Ankyrin<sub>G</sub> epitopes. **(A, left)** Representative images (maximum intensity projections) of neurons expressing GCaMP6f, SomaGCaMP6f1 or SomaGCaMP6f2 (from top to bottom, respectively) and immunostained against Kv2.1 (blue). **(A, right)** Average fluorescent profiles down the axon of neurons with immunostained Kv2.1 in GCaMP6f (red), SomaGCaMP6f1 (blue) or SomaGCaMP6f2 (green) conditions (n = 6 GCaMP6f expressing neurons from 3 cultures; n = 6 SomaGCaMP6f1 expressing neurons from 2 cultures; n = 6 SomaGCaMP6f2 expressing neurons from 4 cultures). Normalized to the soma value. n.s., not significant, Bonferroni-corrected Kruskal-Wallis analysis of variance; see **Supplemental Table 6** for full statistics for **Figure S2**. Plotted is mean (solid line) plus or minus standard error (shaded area) throughout the figure. **(B)** As in A, but for NaV1.2 (n = 6 GCaMP6f expressing neurons from 3 cultures; n = 6 SomaGCaMP6f1 expressing neurons from 4 cultures; n = 6 SomaGCaMP6f2 expressing neurons from 2 cultures). **(C)** As in A, but for Ankyrin<sub>G</sub> (n = 6 GCaMP6f expressing neurons from 4 cultures; n = 5 SomaGCaMP6f1 expressing neurons from 2 cultures; n = 6 SomaGCaMP6f2 expressing neurons from 2 cultures). **(D)** As in A, but for CaV2.1 (n = 5 GCaMP6f expressing neurons from 2 cultures; n = 5 SomaGCaMP6f1 expressing neurons from 2 cultures; n = 5 SomaGCaMP6f2 expressing neurons from 5 cultures).

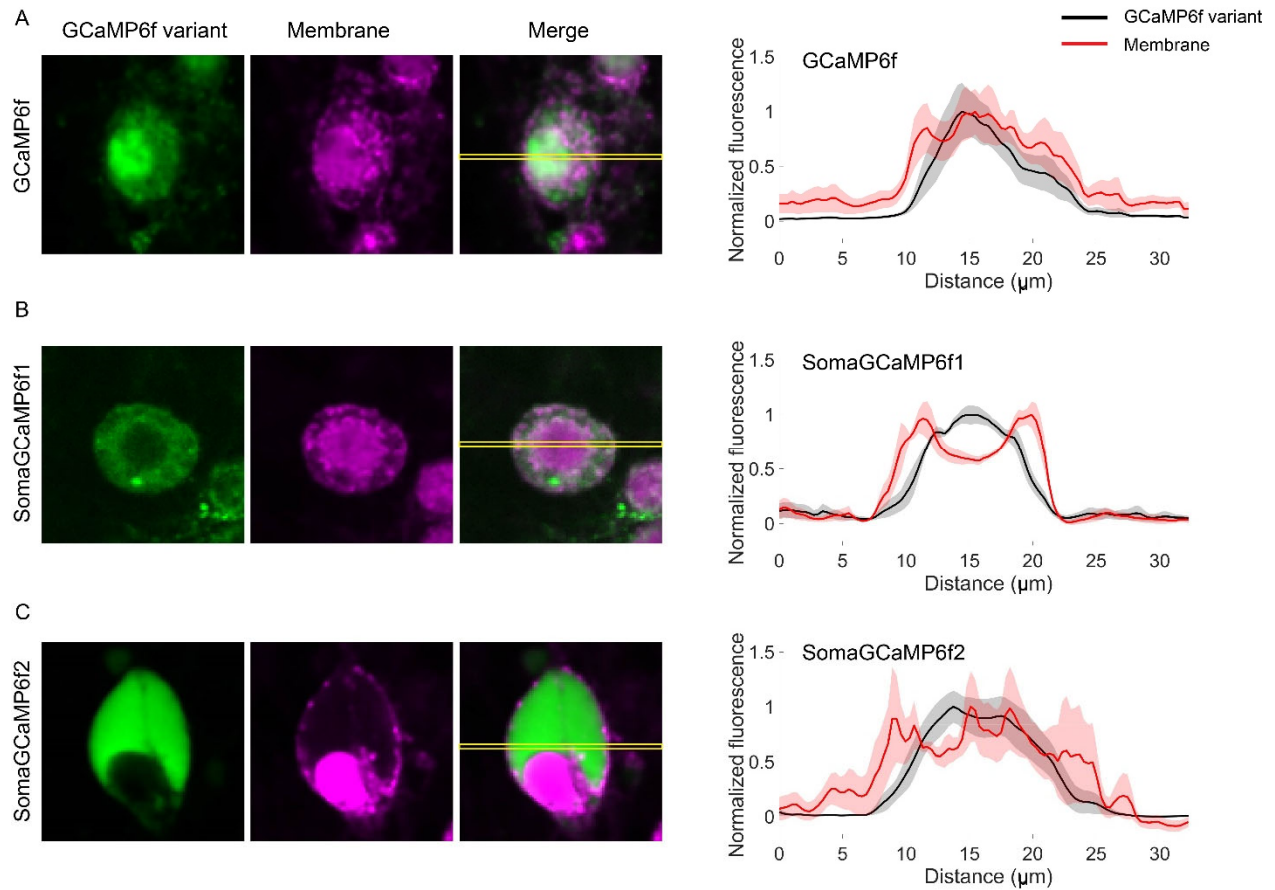

**Figure S3. Fluorescent profiles of GCaMP6f, SomaGCaMP6f1 and SomaGCaMP6f2 in comparison to the fluorescent profile of the membrane in cell bodies of cultured neurons; related to Figure 3.** (A, left) An image (single confocal slice) of a hippocampal neural cell body expressing GCaMP6f (green, left panel) and stained with the membrane labeling dye WGA-647 (magenta, middle panel). Merge of the left and middle panels is presented on the right panel. The yellow rectangle indicates the region of interest for fluorescent profile analysis throughout this figure. (A, right) Average fluorescent profiles of GCaMP6f (black) and the membrane (red) ( $n = 7$  neurons from 2 cultures). Plotted is mean (solid line) plus or minus standard error (shaded area) throughout the figure. (B) As in A, but for SomaGCaMP6f1 ( $n = 4$  neurons from 2 cultures). (C) As in A, but for SomaGCaMP6f2 ( $n = 6$  neurons from 2 cultures).

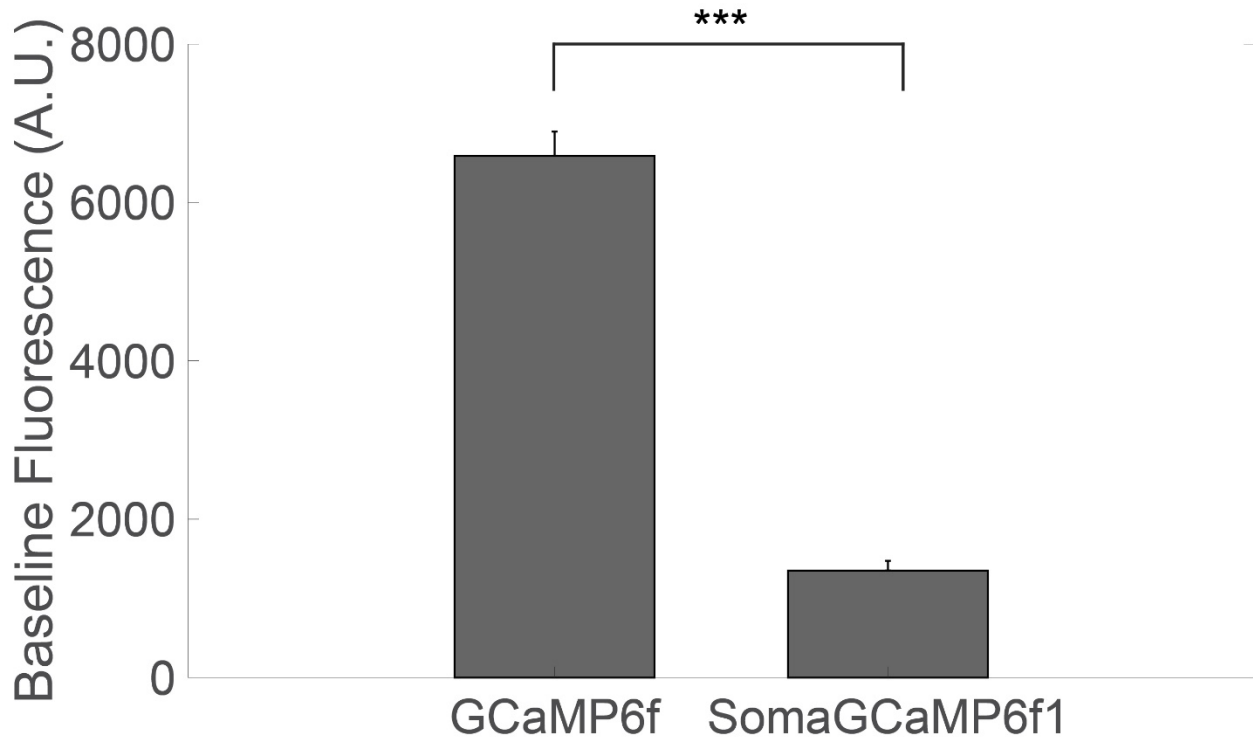

**Figure S4. Baseline fluorescence brightness of GCaMP6f and SomaGCaMP6f1 in living brain slices; related to Figure 4.** Bars show average baseline brightness values for cells expressing GCaMP6f or SomaGCaMP6f1 in slice (n = 42 neurons from 4 slices from 2 GCaMP6f mice; n = 43 neurons from 8 slices from 3 SomaGCaMP6f1 mice). Error bars indicate standard error of the mean. \*\*\*P < 0.001, Kolmogorov-Smirnov test of baseline fluorescence brightness between GCaMP6f and SomaGCaMP6f1; see **Supplemental Table 6** for full statistics for **Figure S4**.

**A**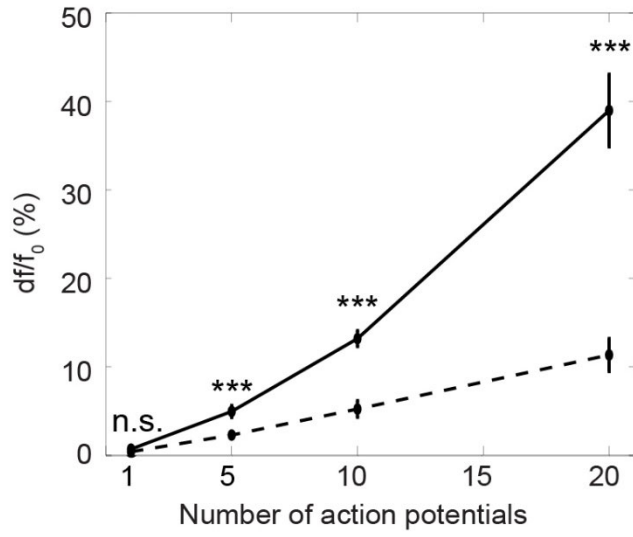**B**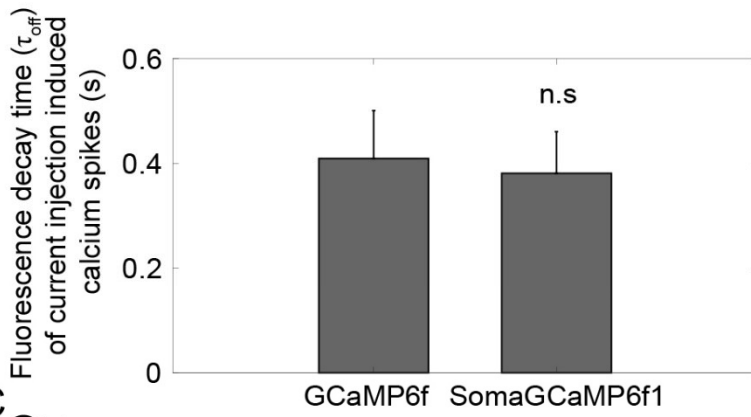**C**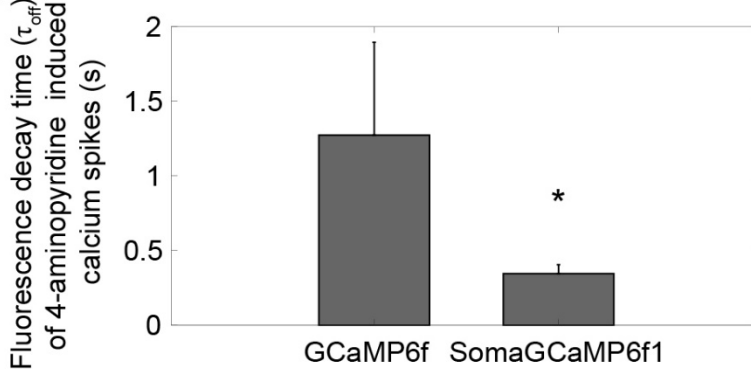**D**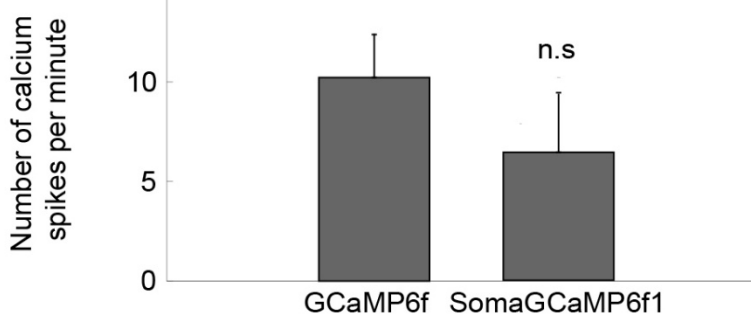

**Figure S5. Sensitivity of multiple action potentials, temporal dynamics and event rate for GCaMP6f and SomaGCaMP6f1; related to Figure 4.** (A) A graph showing the  $df/f_0$  of the calcium transient elicited after a train of 1, 5, 10 and 20 current pulses (500 pA, 5 ms duration, 50 Hz) for neurons expressing GCaMP6f (dotted line) or SomaGCaMP6f1 (unbroken line,  $n = 7$  neurons from 5 slices from 2 mice for GCaMP6f;  $n = 5$  neurons from 3 slices from 2 mice for SomaGCaMP6f1). n.s., not significant,  $***P < 0.001$ , Bonferroni-corrected Wilcoxon rank sum test of the  $df/f_0$  between GCaMP6f and SomaGCaMP6f1 expressing neurons; see **Supplemental Table 6** for full statistics for **Figure S5**. Plotted is mean plus or minus standard error throughout the figure. (B) Bar chart showing the mean  $\tau_{off}$  of calcium spikes in slice, during electrophysiological inducement of single action potentials ( $n = 3$  neurons from 3 slices from 3 mice for GCaMP6f;  $n = 3$  neurons from 3 slices from 3 mice for SomaGCaMP6f1). n.s., not significant, Wilcoxon rank sum test between GCaMP6f and SomaGCaMP6f1. (C) Bar chart showing the mean  $\tau_{off}$  of calcium spikes in slice, during 4-aminopyridine inducement of single action potentials ( $n = 5$  neurons from 5 slices from 4 mice for GCaMP6f;  $n = 5$  neurons from 4 slices from 3 mice for SomaGCaMP6f1).  $*P < 0.05$ , Wilcoxon rank sum test between GCaMP6f and SomaGCaMP6f1. (D) Bar chart showing the mean event rate of calcium spikes per minute in slice ( $n = 8$  neurons from 8 slices from 4 mice for GCaMP6f;  $n = 6$  neurons from 6 slices from 3 mice or SomaGCaMP6f1). n.s., not significant, Wilcoxon rank sum test between GCaMP6f and SomaGCaMP6f1.

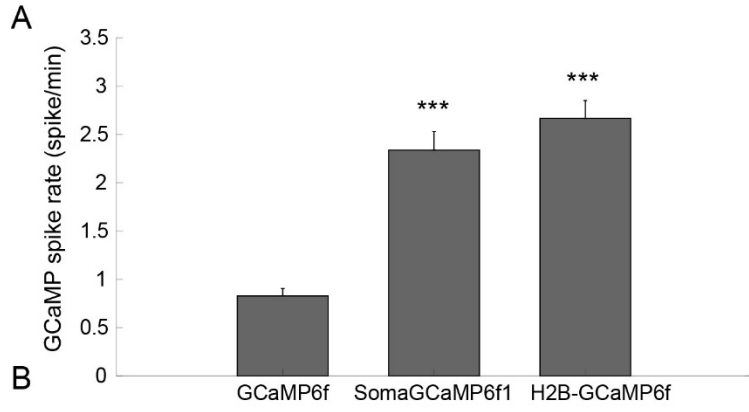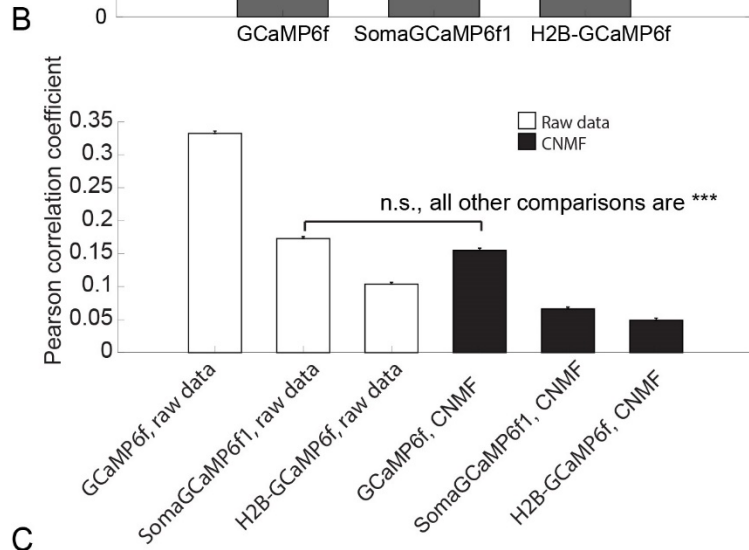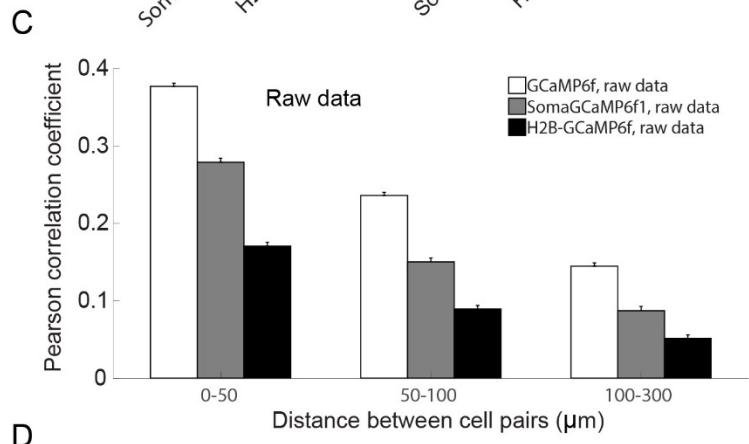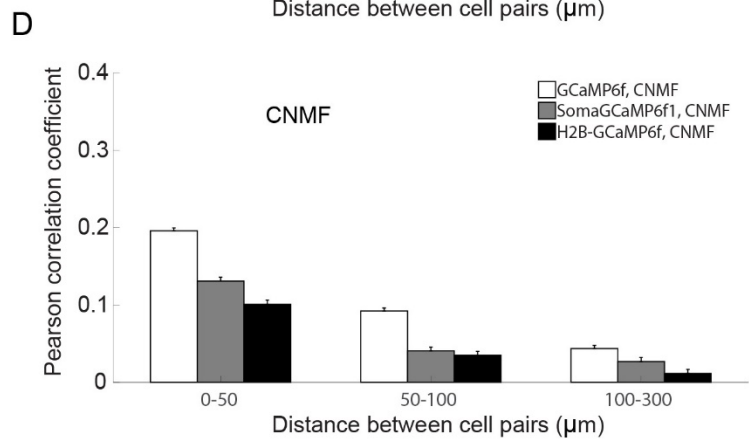



**Figure S6. Temporal dynamics and calcium spike count for GCaMP6f and SomaGCaMP6f1 expressing neurons in zebrafish larvae, driven by 4-AP; related to Figure 6.** (A) A bar chart showing the mean GCaMP-spike rates for neurons in regions of the larval zebrafish forebrain expressing either GCaMP6f, SomaGCaMP6f1 or H2B-GCaMP6f (n = 101 neurons from 5 fishes for GCaMP6f; n = 146 neurons from 4 fishes for SomaGCaMP6f1; n = 513 neurons from 6 fishes for H2B-GCaMP6f). \*\*\*P<0.001, Kruskal-Wallis analysis of variance followed by post-hoc test via Steel's test; see **Supplemental Table 6** for full statistics for **Figure S6**. Plotted is mean +/- standard error throughout this figure. (B) A bar chart showing the mean Pearson correlation coefficient between cell pairs in the larval zebrafish forebrain expressing either GCaMP6f, SomaGCaMP6f1 or H2B-GCaMP6f (n = 426 neurons from 5 fishes for GCaMP6f; n = 340 neurons from 4 fishes for SomaGCaMP6f1; n = 676 neurons from 6 fishes for H2B-GCaMP6f). White bars are for correlation coefficients calculated from raw data. Black bars are for correlation coefficients calculated after CNMF was applied to the raw data. n.s., not significant. \*\*\*P<0.001, Kruskal-Wallis analysis of variance followed by post-hoc Tukey's HSD test;. (C) A bar chart showing the mean Pearson correlation coefficient between cell pairs in the larval zebrafish forebrain expressing either GCaMP6f (white), SomaGCaMP6f1 (gray) or H2B-GCaMP6f (black), in three distance ranges from the soma: 0-50  $\mu\text{m}$ , 50-100  $\mu\text{m}$  and 100-300  $\mu\text{m}$  (n = 426 neurons from 5 fishes for GCaMP6f; n = 340 neurons from 4 fishes for SomaGCaMP6f1; n = 676 neurons from 6 fishes for H2B-GCaMP6f). Correlation coefficient was calculated from raw data.. (D) A bar chart showing the mean Pearson correlation coefficient between cell pairs in the larval zebrafish forebrain expressing either GCaMP6f (white), SomaGCaMP6f1 (gray) or H2B-GCaMP6f (black), in three distance ranges from the soma: 0-50  $\mu\text{m}$ , 50-100  $\mu\text{m}$  and 100-300  $\mu\text{m}$  (n = 426 neurons from 5 fishes for GCaMP6f; n = 340 neurons from 4 fishes for SomaGCaMP6f1; n = 676 neurons from 6 fishes for H2B-GCaMP6f). Correlation coefficient was calculated after CNMF was applied to raw data.

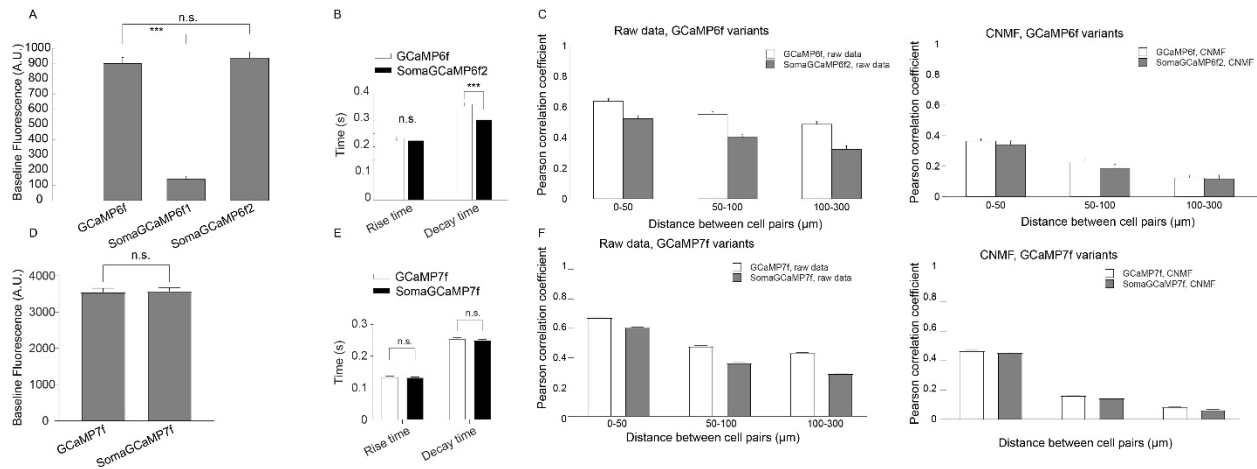

**Figure S7. Baseline fluorescence brightness, kinetics and pairwise correlations of GCaMP and SomaGCaMP variants in mouse striatum in vivo; related to Figure 7.** (A) Bar chart showing the baseline fluorescence in vivo in the dorsal striatum for GCaMP6f, SomaGCaMP6f1 and SomaGCaMP6f2 ( $n = 75$  neurons from 5 mice for GCaMP6f;  $n = 50$  neurons from 2 mice for SomaGCaMP6f1;  $n = 80$  neurons from 4 mice for SomaGCaMP6f2).  $***P < 0.001$ , Kruskal-Wallis analysis of variance followed by post-hoc test via Steel's test with GCaMP6f as control group; see **Supplemental Table 6** for full statistics for **Figure S7**. n.s., not significant, Kruskal-Wallis analysis of variance followed by post-hoc test via Steel's test with GCaMP6f as control group. Plotted is mean  $\pm$  standard error throughout the figure. (B) Bar chart showing the average rise time ( $\tau_{on}$ ) and the average decay time ( $\tau_{off}$ ) for neurons expressing either SomaGCaMP6f2 or GCaMP6f ( $n = 594$  neurons from 4 mice expressing SomaGCaMP6f2,  $n = 930$  neurons from 6 GCaMP6f mice). n.s., not significant, Wilcoxon rank sum test between the rise times of SomaGCaMP6f2 and GCaMP6f expressing neurons;  $*** P < 0.001$ , Wilcoxon rank sum test between the decay times of SomaGCaMP6f2 and GCaMP6f expressing neurons. (C, left) A bar chart showing the mean Pearson correlation coefficient between cell pairs in the mouse striatum expressing either GCaMP6f (white) or SomaGCaMP6f2 (gray), in three distance ranges from the soma: 0-50  $\mu\text{m}$ , 50-100  $\mu\text{m}$  and 100-300  $\mu\text{m}$  ( $n = 860$  neurons from 6 mice for GCaMP6f;  $n = 149$  neurons from 4 mice for SomaGCaMP6f2). Correlation coefficient was calculated from raw data. (C, right) A bar chart showing the mean Pearson correlation coefficient between cell pairs in the mouse striatum expressing either GCaMP6f (white) or SomaGCaMP6f2 (gray), after undergoing CNMF, in three distance ranges from the soma: 0-50  $\mu\text{m}$ , 50-100  $\mu\text{m}$  and 100-300  $\mu\text{m}$  ( $n = 634$  cells from 4 mice for GCaMP6f;  $n = 1098$  cells from 5 mice for SomaGCaMP6f2). Correlation coefficient was calculated from raw data. (D) Bar chart showing the baseline fluorescence in vivo in the dorsal striatum for GCaMP7f and SomaGCaMP7f ( $n = 851$  neurons from 5 mice for GCaMP7f;  $n = 1098$  neurons from 5 mice for SomaGCaMP7f). n.s., not significant, Wilcoxon rank sum test between the baseline fluorescence of SomaGCaMP7f and GCaMP7f expressing neurons. (E) Bar chart showing the average rise time ( $\tau_{on}$ ) and the average decay time ( $\tau_{off}$ ) for neurons expressing either SomaGCaMP7f or GCaMP7f ( $n = 851$  neurons from 5 mice for GCaMP7f;  $n = 1098$  neurons from 5 mice for SomaGCaMP7f). n.s., not significant, Wilcoxon rank sum test between the rise or decay times of SomaGCaMP7f and GCaMP7f expressing neurons. (F, left) A bar chart showing the mean Pearson correlation coefficient between cell pairs in the mouse striatum expressing either

GCaMP7f (white) or SomaGCaMP7f (gray), in three distance ranges from the soma: 0-50  $\mu\text{m}$ , 50-100  $\mu\text{m}$  and 100-300  $\mu\text{m}$  ( $n = 860$  neurons from 6 mice for GCaMP6f;  $n = 149$  neurons from 4 mice for SomaGCaMP6f2). Correlation coefficient was calculated from CNMF applied to raw data. **(F, right)** A bar chart showing the mean Pearson correlation coefficient between cell pairs in the mouse striatum expressing either GCaMP7f (white) or SomaGCaMP7f (gray), after undergoing CNMF, in three distance ranges from the soma: 0-50  $\mu\text{m}$ , 50-100  $\mu\text{m}$  and 100-300  $\mu\text{m}$  ( $n = 634$  cells from 4 mice for GCaMP7f;  $n = 1098$  cells from 5 mice for SomaGCaMP7f). Correlation coefficient was calculated from CNMF applied to raw data.

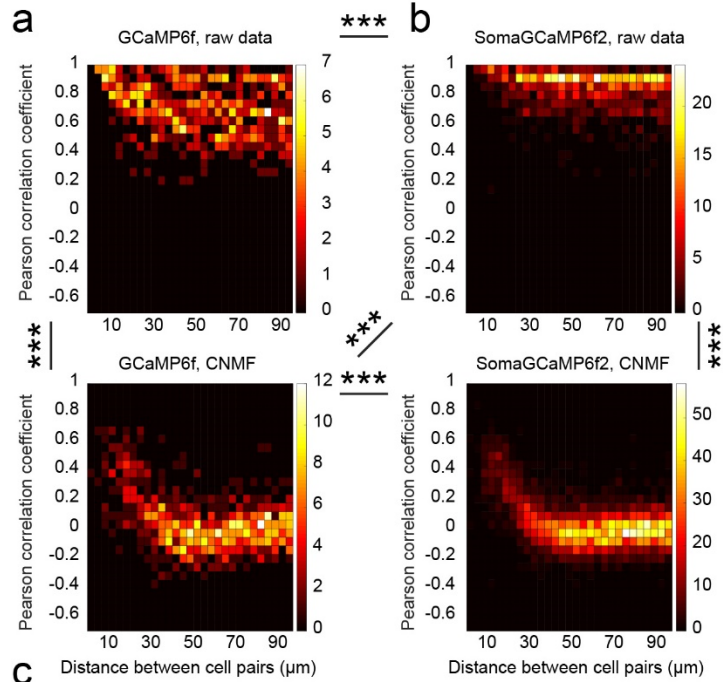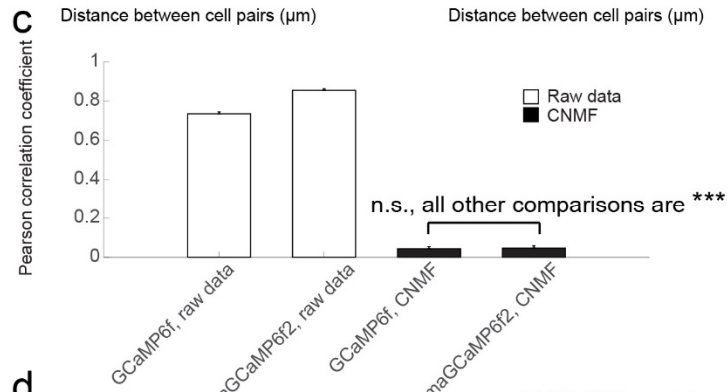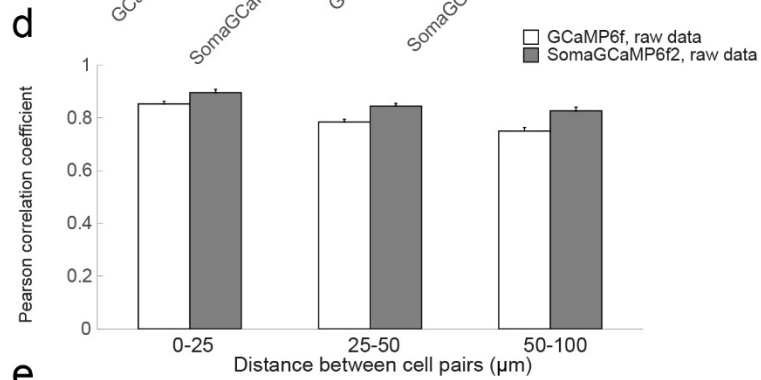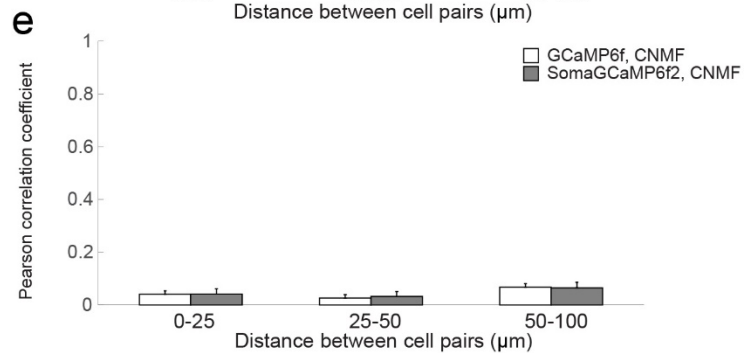

**Figure S8. Correlelograms based on neurons expressing GCaMP6f or SomaGCaMP6f2 imaged with a GRIN lens in the medial prefrontal cortex; related to Figure 8. (A, B)**

Correlelograms denoting the relationship of distance to the strength of correlated fluorescence between cell pairs from mice expressing GCaMP6f (**A**; n = 107 neurons from 2 mice) or SomaGCaMP6f2 (**B**; n = 222 neurons from 4 mice). Distance distributions are shown on the x-axis and Pearson correlation coefficients are shown on the y-axis. (**top row**) Analysis was performed using raw data. (**bottom row**) Analysis was performed using data subjected to the neuropil contamination elimination algorithm CNMF. \*\*\*P < 0.001, two-dimensional Kolmogorov-Smirnov test between GCaMP6f and SomaGCaMP6f1; see **Supplemental Table 6** for full statistics for **Figure S8**. (**C**) A bar chart showing the mean Pearson correlation coefficient between cell pairs in the mouse medial prefrontal cortex expressing either GCaMP6f or SomaGCaMP6f2 (n = 107 neurons from 2 mice for GCaMP6f; n = 222 neurons from 4 mice for SomaGCaMP6f2). White bars are for correlation coefficients calculated from raw data. Black bars are for correlation coefficients calculated from CNMF applied to the raw data. n.s., not significant. \*\*\*P < 0.001, Kruskal-Wallis analysis of variance followed by post-hoc Tukey's HSD test. Plotted is mean +/- standard error throughout this figure. (**D**) A bar chart showing the mean Pearson correlation coefficient between cell pairs in the mouse medial prefrontal cortex expressing either GCaMP6f (white) or SomaGCaMP6f2 (gray), in three distance ranges from the soma: 0-25  $\mu\text{m}$ , 25-50  $\mu\text{m}$  and 50-100  $\mu\text{m}$  (n = 107 neurons from 2 mice for GCaMP6f; n = 222 neurons from 4 mice for SomaGCaMP6f2). Correlation coefficient was calculated from raw data. (**E**) A bar chart showing the mean Pearson correlation coefficient between cell pairs in the mouse medial prefrontal cortex expressing either GCaMP6f (white) or SomaGCaMP6f2 (gray), in three distance ranges from the soma: 0-25  $\mu\text{m}$ , 25-50  $\mu\text{m}$  and 50-100  $\mu\text{m}$  (n = 107 neurons from 2 mice for GCaMP6f; n = 222 neurons from 4 mice for SomaGCaMP6f2). Correlation coefficient was calculated after CNMF was applied to raw data.

## Supplemental Tables

### Supplemental Table 1. Related to Figures 1 and 2.

**Supplemental Table 1A: Proteins that were considered in this study as potential soma targeting fragments.** For amino acid sequences corresponding to the acronyms used, see **Supplemental Table 7** (successful fusions between these proteins and GCaMP6f or GCaMP7f are presented in **Figures 1, 2**).

**Supplemental Table 1B: GCaMP6f fusion proteins that were screened in cultured hippocampal neurons in this project** (successful candidates are presented in **Figures 1, 2**).

**Supplemental Table 2: Statistical analysis for Figure 1, 2 and 3. Related to Figures 1, 2, and 3.**

**Supplemental Table 3: Statistical analysis for mouse brain slice, and for fish and mouse in vivo experiments** (which include **Figures 4, 6, 7, 8**). Related to **Figures 4, 6, 7, and 8**.

**Supplemental Table 4: statistical analysis for Figure 5.**

Figure 5G Two-way analysis of variance (ANOVA) of the correlation coefficient between the ground-truth calcium dynamics and recorded calcium dynamics in the simulations for mouse, followed by post-hoc Tukey's HSD test.

Factor 1, molecules: SomaGCaMP6f2 vs GCaMP6f.  
Factor 2, demixing: with CMNF vs without CMNF.

n = 300 neurons from 10 simulations for SomaGCaMP6f2; n = 300 neurons from 10 simulations for GCaMP6f.

Two-way ANOVA table:

| Source      | SS       | df   | MS     | F       | Prob>F   |
|-------------|----------|------|--------|---------|----------|
| Molecules   | 6.2098   | 1    | 6.2098 | 40.5516 | 2.72E-10 |
| Demixing    | 0.0981   | 1    | 0.0981 | 0.6408  | 0.4236   |
| Interaction | 0.1592   | 1    | 0.1592 | 1.0394  | 0.3082   |
| Error       | 183.1481 | 1196 | 0.1531 | -       | -        |
| Total       | 189.6152 | 1199 | -      | -       | -        |

Post-hoc Tukey's HSD test on Factor 1, molecules (SomaGCaMP6f2 vs GCaMP6f):

$$P = 2.9646e-10$$

Figure 5H Two-way analysis of variance (ANOVA) of the correlation coefficient between the ground-truth calcium dynamics and recorded calcium dynamics in the simulations for zebrafish, followed by post-hoc Tukey's HSD test.

Factor 1, molecules: SomaGCaMP6f1 vs GCaMP6f.

Factor 2, demixing: with CMNF vs without CMNF.

n = 1200 neurons from 10 simulations for SomaGCaMP6f1; n = 1200 neurons from 10 simulations for GCaMP6f.

Two-way ANOVA table:

| Source      | SS       | df   | MS      | F        | Prob>F   |
|-------------|----------|------|---------|----------|----------|
| Molecules   | 24.4007  | 1    | 24.4007 | 260.8343 | 3.76E-57 |
| Demixing    | 0.2303   | 1    | 0.2303  | 2.4618   | 0.1167   |
| Interaction | 0.2002   | 1    | 0.2002  | 2.1397   | 0.1436   |
| Error       | 441.1751 | 4716 | 0.0935  | -        | -        |
| Total       | 466.0063 | 4719 | -       | -        | -        |

Post-hoc Tukey's HSD test on Factor 1, molecules (SomaGCaMP6f1 vs GCaMP6f):

$$P = 1.0597e-10$$

**Supplemental Table 5: Statistical analysis for Figure S1 – membrane and action potential properties. Related to Figure 3.**

**Supplemental Table 6: Statistical analysis for Figure S2, S4, S5, S6, S7, S8. Related to Figures 1-8.**

**Supplemental Table 7: Amino acid sequences for protein fragments used in this paper.  
Related to Figures 1, 2.**

**AnkTail-motif (Ankyrin<sub>G</sub> (1934-2333)):**

REGRIDDEEPPFKIVEKVKEDLVK VSEILKKDVCVESKGPPKSPKSDKGHSPEDDWTEFSS  
EEIREARQAAASHAPSLPERVHGKANLTRVIDYLTNDIGSSSLTNLKYKFEEAKKDGEER  
QKRILKPAMALQEHKMKMPPASMRPSTSEKELCKMADSFSGADAILESPDDFSQHDQDK  
SPLSDSGFETRSEKTPSAPQSAESTGPKPLFHEVPIPPVITETRTEVVHVIRSYEPSSGEIPQS  
QPEDPVSPKPSPTFMELEPKPTTSSIKEKVKAFQMKASSEEDHSRVLSKGMRVKEETHI  
TTTTTRMVYHSPPGGECASERIEETMSVHDIMKAFQSGRDPSKELAGLFEHKSAMSPDVA  
KSAAETSAQHAEKDSQMKPKLERIIEVHIEKGPQSPCE

**EE-RR:**

LEIEAAFLEQENTALETEVAELEQEVQRLENIVSQYETRYGPLGSLEIRAAFLRRRNTALR  
TRVAELRQRVQRLRNIVSQYETRYGPL

**AcidP1-BaseP1:**

AQLEKELQALEKENAQLWELQALEKELAQSGSQAQLKKKLQALKKKNAQLKWKLQ  
ALKKKLAQ

**nullsfGFP (mutation to abolish the fluorescence of the original sfGFP is underlined)**

MSKGEELFTGVVPILVELDGDVNGHKFSVRGEGEGDATNGKLTCLKFICTTGKLPVPWPT  
LVTTLTTGGVQCFSRYPDHMKRHDFFKSA MPEGYVQERTISFKDDGTYKTRAEVKFEGD  
TLVNRIELKGIDFKEDGNILGHKLEYNFNHNVYITADKQKNGIKANFKIRHNVEDGSGVQ  
LADHYQQNTPIGDGPVLLPDNHYLSTQSVLSKDPNEKRDHMLLEFVTAAGITHGMDE  
LYK

**NLS**

RKRPSDLVHVFSPPRKK

**KGC**

KSRLTSEGEYIPLDQIDINV

**ER2**

FCYENEV

**nullCoChR (mutation to abolish photocurrent of the original CoChR is underlined)**

MLGNGSAIVPIDQCFCFLAWTDSLGSDEQLVANILQWFAFGFSILILMFYAYQTRWATC  
GWEEVYVCCVELTKVIEFFHEFDDPSMLYLANGHRVQWLRYAEWLLTCPVILIHLSNL  
TGLKDDYSKRTMRLLVSDVGTIVWGATSAMSTGYVKVIFVVLGCIYGANTFFHAAKVYI  
ESYHVVPKGRPRTVVRIMAWLFFLSWGMFPVLFVVGPEGFDAISVYGSTIGHTIIDLMSA  
NCWGLLGHYLRVLIHQHIIYGDIRKKTKINVAGEEMEVETMVDQEDEETV



**KA2(1-150)**

MPAELLLLLIVAFANPSCQVLSSLRMAAILDDQTVCGRGERLALALAREQINGIIEVPAK  
ARVEVDIFELQRDSQYETTTDTMCQILPKGVVSVLGPSSSPASASTVSHICGEKEIPHIKVG  
PEETPRLQYLRFASVSLYPSNEDVSLAVS

**KA2(1-150)-Y76A**

MPAELLLLLIVAFANPSCQVLSSLRMAAILDDQTVCGRGERLALALAREQINGIIEVPAK  
ARVEVDIFELQRDSQAETTTDTMCQILPKGVVSVLGPSSSPASASTVSHICGEKEIPHIKVG  
PEETPRLQYLRFASVSLYPSNEDVSLAVS

**KA2(1-100)**

MPAELLLLLIVAFANPSCQVLSSLRMAAILDDQTVCGRGERLALALAREQINGIIEVPAK  
ARVEVDIFELQRDSQYETTTDTMCQILPKGVVSVLGPSSSP

**Ank(1-334) (Ankyrin<sub>C</sub> (1-334))**

MAHAASQLKKNRDLEINAEETEKKKKHRKRSRDRKKKSDANASYLRAARAGHLEKA  
LDYIKNGVDVNICNQNGLNALHLASKEGHVEVSELLQREANVDAATKKGNTALHIAS  
LAGQAEVVKVLVTNGANVNAQSQNGFTPLYMAAQENHLEVVRFLLDNGASQSLATED  
GFTPLAVALQQGHDQVVSLLLENDTKGKVRLPALHIAARKDDTKAAALLLQNDTNADI  
ESKMVVNRATESGFTSLHIAAHYGNINVATLLLNRAAAVDFTARNDITPLHVASKRGNA  
NMVLLLLDRGAKIDAKTRDGLTPLHCGARSGHEQVVEMLLDRAAP

**AnkCT-motif (Ankyrin<sub>C</sub> (2334-2622))**

RTDIRMAIVADHLGLSWTELARELNFSVDEINQIRVENPNLSISQSFMLLKKWVTRDGKN  
ATTDALTSVLTINRIDIIVTLLEGPIFDYGNISGTRSFADENNVFHDVPDVGWQNETPSGSL  
ESPAQARRLTGGLLDRLDDSSDQARDSITSYLTGEPGKIEANGNHTAEVIPEAKAKPYFP  
ESQNDIGKQSIKENLKPETHGCGRTEEPVSPLTAYQKSLEETSCLVIEDAPKPCVPVGMK  
KMTRTTADGKARLNQEEEGSTRSEPKQEGGYKVKTKKEIRNVEKKTH

**AnkMB-motif (Ankyrin<sub>C</sub> (1-800))**

MAHAASQLKKNRDLEINAEETEKKRKHKRSRDRKKKSDANASYLRAARAGHLEKA  
LDYIKNGVDVNICNQNGLNALHLASKEGHVEVSELLQREANVDAATKKGNTALHIAS  
LAGQAEVVKVLVTNGANVNAQSQNGFTPLYMAAQENHLEVVRFLLDNGASQSLATED  
GFTPLAVALQQGHDQVVSLLLENDTKGKVRLPALHIAARKDDTKAAALLLQNDTNAD  
VESKSGFTPLHIAAHYGNINVATLLLNRAAAVDFTARNDITPLHVASKRGNANMVLLLL  
DRGAKIDAKTRDGLTPLHCGARSGHEQVVEMLLDRSAPILSKTKNGLSPLHMATQGDH  
LNCVQLLQHNVPVDDVTNDYLTALHVAACHGHIYKVAKVLLDKKASPNAKALNGFTPL  
LHIACKNRIRVMELLKKGASIQAVTESGLTPIHVAAFMGHVNIIVSQLMHHGASPNTT  
NVRGETALHMAARSGQAEVVRYLVQDGAQVEAKAKDDQTPHISARLGKADIVQQLL  
QQGASPNAATTSGYTPLHLAAREGHEDVAAFLLDHGASLSITTKKGFTPLHVAAKYGKL  
EVASLLLQKSASPDAAGKSGLTPLHVAAHYDNQKVALLLLDQGASPHAAAKNGYTPLH  
IAAKKNQMDIATSLLEYGADANAVTRQGIASVHLAAQEGHVDMVSLLLSRNANVNLSN

KSGLTPLHLAAQEDRVNVAEVLVNQGAHVDAQTKMGYTPLHVGCHYGNIKIVNFLLO  
HSAKVNAKTKNGYTALHQAQQGHTHIINVLLQNNASPNELTVNGNTAL

**AnkSB-motif (Ankyrin<sub>G</sub> (801-1521))**

AIARRLGYISVVDTLKVVTEEIMTTTTITEKHKMNVPETMNEVLDMSSDDEVKASAPEK  
LSDGEYISDGEEGEDAITGDTDKYLGPDQLKELGDDSLPAEGYVGFSLGARSASLRSFSS  
DRSYTLNRSSYARDSMMIEELLVPSKEQHLTFTREFDSDSLRHYSWAADTLDNVNLVSS  
PVHSGFLVSMVDARGGSMRGRSRHHGMRIIIPPRKCTAPTRITCRLVKRHKLANPPPMVE  
GEGLASRLVEMGPAGAQLGVPVIVEIPHFGSMRGKERELIVLRSENGETWKEHQFDSKN  
EDLAELNGMDEELDSPEELGTRICRIITKDFPQYFAVVSRIKQESNQIGPEGGILSSTTV  
PLVQASFPAGALTKRIRVGLQAQPVPEETVKKILGNKATFSPIVTVPRRRKFHKPITMTI  
PVPPPSGEGVSNGYKGDATPNLRLLCISITGGTSPAQWEDITGTTPLTFIKDCVSFTTNVSA  
RFLWADCHQVLETVGLASQLYRELICVPYMAKFVVFVAKTNDPVESLRCFCMTDDRVD  
KTLEQQENFEEVARSKDIEVLEGGKPIYVDCYGNLAPLTKGGQQLVFNFYSFKENRPFISI  
KIRDTSQEPCGRLSFLKEPKTTKGLPQTAVCNLTLPALHKKETESDQDDAEKADRRQSF  
ASLALRKRYSYLTPSMKTVERSSGTARSLPTTYSHKPPFFSTRPYQSWTTAPITVPGPAKS  
GSLSSSPSNTPSA

**AnkSR-motif (Ankyrin<sub>G</sub> (1534 -1933))**

SPLKSIWSVSTPSPIKSTLGASTTSSVKSISDVASPIRSFRTVSSPIKTVVSPSPYNPQVASGT  
LGRVPTITEATPIKGLAPNSTFSSRTSPVTTAGSLLERSSITMTPPASPKSNITMYSSSLPFK  
SIITSATPLISSPLKSVVSPTKSAADVISTAKATMASSLSPLKQMSGHAEVALVNGSVSPL  
KYPSSSALINGCKATATLQDKISTATNAVSSVVSAASDTVEKALSTTTAMPFSPLRSYVS  
AAPSALFQSLRTPSASALYTSLGSSIAATTSSVTSSIIITVPVYSVVNVLPPEALKKLPDSNSF  
TKSAAALLSPIKTLTTETRPQPHFNRTPSPVKSSFLASSALKPSVPSSLSSSQEILKDVAE  
MKEDLMRMTAILQTDVPEEKPFQTDLP

**K<sub>v</sub>2.1-motif (K<sub>v</sub>2.1(536-600))**

QSQPILNTKEMAPQSKPPEELEMSSMPSPVAPLPARTEGVIDMRSMSSIDSFISCATDFPE  
ATRF

**rSK1-tail (rSK1(351-411))**

QAQKLRTVKIEQGGKVNQANTLADLAKAQSIAYEVVSELQAQQEELEARLAALESRLD  
VLGASLQALPSLIAQAICPLPPPWPGPSHLTTAAQSPQSHWLPTTASDCG

**Nav1.6(II-III)**

TVRVPIAVGESDFENLNTEDVSSESDP

**Nav1.2(I-II)**

YEEQNQATLEEAEQKEAEFQQMLEQLKKQEEAQAAAAASAESRDFSGAGGIGVFSE  
SSSVASKLSSKSEKELKNRRKKKKQKEQAGEEEKEDAVRKSASEDSIRKKGFQFSLEGS  
RLTYEKRFSSPHQSLLSIRGSLFSPRRNSRASLNFNFKGRVKDIGSENDFADEHSTFEDND  
SRRDSLFPVPHRHGERRPSNVSQASRASRGIPMNGMKMHSVDCNGVVSLVGGPSALT  
SPVGQLLEGGTTTETEIRKRRSSSYHVSMDLLEDPSRQRAMSMASILTNTMEELEESRQK  
CPPCWYKFANMCLIWDCCKPWLKVKHVVN

**Supplemental Table 8: Percentage of saturated pixels in images presented. Related to Figures 1, 2, 4, 6, 7, 8.**

**Figure 1, panels C, D, E, I, J**

| <b>Variant</b>      | <b>Saturated pixels in non-saturated image</b> | <b>Saturated pixels in saturated image</b> | <b>Total number of pixels in image</b> | <b>% of saturated pixels in the non-saturated image</b> | <b>% of saturated pixels in the saturated image</b> |
|---------------------|------------------------------------------------|--------------------------------------------|----------------------------------------|---------------------------------------------------------|-----------------------------------------------------|
| <b>GCaMP6f</b>      | 0                                              | 4825                                       | 4194304                                | 0                                                       | 0.1150369644                                        |
| <b>SomaGCaMP6f1</b> | 0                                              | 5882                                       | 4194304                                | 0                                                       | 0.1402378082                                        |
| <b>SomaGCaMP6f2</b> | 0                                              | 4819                                       | 4194304                                | 0                                                       | 0.1148939133                                        |
|                     |                                                |                                            |                                        |                                                         |                                                     |
| <b>GCaMP7f</b>      | 0                                              | 4789                                       | 4194304                                | 0                                                       | 0.1141786575                                        |
| <b>SomaGCaMP7f</b>  | 0                                              | 12917                                      | 4194304                                | 0                                                       | 0.3079652786                                        |

**Figure 2**

**Panels A, B, C**

| <b>Variant</b>      | <b>Saturated pixels in image</b> | <b>Total number of pixels in image</b> | <b>% of saturated pixels in the image</b> |
|---------------------|----------------------------------|----------------------------------------|-------------------------------------------|
| <b>GCaMP6f</b>      | 65                               | 35680                                  | 0.180                                     |
| <b>SomaGCaMP6f1</b> | 60                               | 35680                                  | 0.168                                     |
| <b>SomaGCaMP6f2</b> | 64                               | 35680                                  | 0.179                                     |

**Figure 4**

**Panel A**

| <b>Variant</b>      | <b>Saturated pixels in non-saturated image</b> | <b>Saturated pixels in saturated image</b> | <b>Total number of pixels in image</b> | <b>% of saturated pixels in the non-saturated image</b> | <b>% of saturated pixels in the saturated image</b> |
|---------------------|------------------------------------------------|--------------------------------------------|----------------------------------------|---------------------------------------------------------|-----------------------------------------------------|
| <b>GCaMP6f</b>      | 0                                              | 327                                        | 103200                                 | 0                                                       | 0.3168604651                                        |
| <b>SomaGCaMP6f1</b> | 0                                              | 337                                        | 103200                                 | 0                                                       | 0.3265503876                                        |
| <b>SomaGCaMP6f2</b> | 0                                              | 380                                        | 103200                                 | 0                                                       | 0.3682170543                                        |

**Figure 6**

**Panels A, B**

| <b>Variant</b>      | <b>Saturated pixels in non-saturated image</b> | <b>Saturated pixels in saturated image</b> | <b>Total number of pixels in image</b> | <b>% of saturated pixels in the non-saturated image</b> | <b>% of saturated pixels in the saturated image</b> |
|---------------------|------------------------------------------------|--------------------------------------------|----------------------------------------|---------------------------------------------------------|-----------------------------------------------------|
| <b>GCaMP6f</b>      | 11                                             | 224                                        | 28784                                  | 0.03821567538                                           | 0.7782101167                                        |
| <b>SomaGCaMP6f1</b> | 0                                              | 324                                        | 28784                                  | 0                                                       | 1.125625347                                         |
| <b>GCaMP7</b>       | 0                                              | 227                                        | 28784                                  | 0                                                       | 0.7886325737                                        |
| <b>SomaGCaMP7f</b>  | 4                                              | 351                                        | 28784                                  | 0.01389660923                                           | 1.21942746                                          |

**Figure 7**

**Panels A, B, C, D**

| <b>Variant</b>      | <b>Saturated pixels in image</b> | <b>Total number of pixels in image</b> | <b>% of saturated pixels in the image</b> |
|---------------------|----------------------------------|----------------------------------------|-------------------------------------------|
| <b>GCaMP6f</b>      | 0                                | 154086                                 | 0                                         |
| <b>SomaGCaMP6f1</b> | 0                                | 154086                                 | 0                                         |
| <b>GCaMP7</b>       | 0                                | 122500                                 | 0                                         |
| <b>SomaGCaMP7f</b>  | 0                                | 122500                                 | 0                                         |

**Figure 8**

**Panels A, B, C, D**

| <b>Variant</b>       | <b>Saturated pixels in image</b> | <b>Total number of pixels in image</b> | <b>% of saturated pixels in the image</b> |
|----------------------|----------------------------------|----------------------------------------|-------------------------------------------|
| <b>GCaMP6f</b>       | 1                                | 64500                                  | 0.001550387597                            |
| <b>SomaGCaMP6f12</b> | 1                                | 64500                                  | 0.001550387597                            |
